# Supplementary material for: Unveiling the influence of end-capped acceptors modification on photovoltaic properties of non-fullerene fused ring compounds: a DFT/TD-DFT study
Source: Royal Society of Chemistry journal article supplement (doi:10.1039/d4ra03170a), 2024-01-01
Supplement: d4ra03170a1.pdf [file d4ra03170a1.pdf]

### Supplementary Data

## Unveiling the Influence of End-capped Acceptors Modification on Photovoltaic Properties of Non-Fullerene Fused Ring Compounds: A DFT/TD-DFT Study

Muhammad Khalid,<sup>a,b\*</sup> Noor Fatima,<sup>a,b</sup> Muhammad Arshad,<sup>c</sup> Muhammad Adeel,<sup>d</sup> Ataulpa A. C. Braga,<sup>e</sup> Tansir Ahamad,<sup>f</sup>

<sup>a</sup>Institute of Chemistry, Khwaja Fareed University of Engineering & Information Technology, Rahim Yar Khan, 64200, Pakistan

<sup>b</sup>Centre for Theoretical and Computational Research, Khwaja Fareed University of Engineering & Information Technology, Rahim Yar Khan, 64200, Pakistan

<sup>c</sup>Industry Solutions, Northern Alberta Institute of Technology, Edmonton, Alberta, Canada

<sup>d</sup>Institute of Chemical Sciences, Gomal University, D.I.Khan, Pakistan.

<sup>e</sup>Departamento de Química Fundamental, Instituto de Química, Universidade de São Paulo, Av. Prof. Lineu Prestes, 748, São Paulo, 05508-000, Brazil

<sup>f</sup>Department of Chemistry, College of Science, King Saud University, Saudi Arabia

\*Corresponding author E-mail addresses:

Dr. Muhammad Khalid ([khalid@iq.usp.br](mailto:khalid@iq.usp.br) ; [muhammad.khalid@kfueit.edu.pk](mailto:muhammad.khalid@kfueit.edu.pk))

**Table S1:** Cartesian coordinates of NBR compound.

| Atoms | X-axis    | Y-axis    | Z-axis    |
|-------|-----------|-----------|-----------|
| C     | -2.142938 | -2.010308 | -0.132199 |
| C     | -0.808943 | -2.302666 | -0.144345 |
| C     | 0.157038  | -1.256349 | -0.051983 |
| C     | -0.284834 | 0.111447  | 0.054128  |
| C     | -1.67033  | 0.390788  | 0.065366  |
| H     | 1.875854  | -2.56476  | -0.14226  |
| H     | -0.456989 | -3.326136 | -0.223936 |
| C     | 1.542381  | -1.535974 | -0.062289 |
| C     | 0.681328  | 1.157796  | 0.14607   |
| H     | -2.003207 | 1.419723  | 0.146089  |
| C     | 2.448591  | -0.498736 | 0.028991  |
| H     | 0.329471  | 2.181282  | 0.22545   |
| C     | 2.015552  | 0.866009  | 0.134198  |
| C     | 3.213744  | 1.818609  | 0.221585  |
| C     | 4.367337  | 0.824783  | 0.153653  |
| C     | -2.577861 | -0.646021 | -0.025777 |
| C     | -4.490666 | -1.966643 | -0.150815 |
| C     | -3.340517 | -2.963559 | -0.219656 |
| C     | -4.021875 | -0.662109 | -0.03973  |

|   |           |           |           |
|---|-----------|-----------|-----------|
| C | -5.877731 | -2.087637 | -0.173288 |
| C | -6.598491 | -0.885998 | -0.080699 |
| H | -6.401741 | -3.033043 | -0.256028 |
| C | 3.890973  | -0.477776 | 0.045054  |
| C | 5.756169  | 0.968219  | 0.178043  |
| C | 6.473639  | -0.227535 | 0.086977  |
| H | 6.279658  | 1.909802  | 0.256427  |
| C | 7.853174  | -0.544332 | 0.086994  |
| C | 9.003157  | 0.223538  | 0.093095  |
| C | 9.109599  | 1.703342  | -0.019275 |
| C | 10.364927 | -0.314467 | 0.097225  |
| C | 10.546552 | 2.008092  | -0.186035 |
| C | 11.293243 | 0.821421  | -0.138376 |
| H | 8.029096  | -1.612023 | 0.058062  |
| C | 12.678769 | 0.875957  | -0.293136 |
| C | 13.246282 | 2.129827  | -0.48628  |
| C | 12.51685  | 3.314552  | -0.527288 |
| C | 11.135499 | 3.250341  | -0.37316  |
| H | 13.324342 | 0.011877  | -0.276949 |
| H | 13.034759 | 4.252784  | -0.679208 |
| H | 10.525766 | 4.145008  | -0.399417 |
| C | 10.772657 | -1.613999 | 0.334146  |
| C | 9.900346  | -2.687379 | 0.677313  |
| N | 9.242896  | -3.593748 | 0.969836  |
| C | 12.135438 | -2.028339 | 0.297607  |
| N | 13.224254 | -2.418901 | 0.276737  |
| C | 3.220922  | 2.599146  | 1.553748  |
| H | 3.197276  | 1.920089  | 2.408799  |
| H | 4.119939  | 3.216257  | 1.628111  |
| H | 2.351433  | 3.258574  | 1.613349  |
| C | 3.247271  | 2.797847  | -0.972134 |
| H | 2.38166   | 3.464475  | -0.943917 |
| H | 4.149617  | 3.413414  | -0.933979 |
| H | 3.236892  | 2.260488  | -1.922873 |
| C | -3.3722   | -3.943288 | 0.973681  |
| H | -4.272627 | -4.561873 | 0.935456  |
| H | -2.505148 | -4.608088 | 0.945904  |
| H | -3.363568 | -3.406213 | 1.924592  |
| C | -3.346753 | -3.743914 | -1.551892 |
| H | -3.324238 | -3.064637 | -2.406812 |
| H | -2.476537 | -4.402357 | -1.612133 |
| H | -4.244619 | -4.362846 | -1.626884 |
| O | 8.219172  | 2.53828   | 0.000109  |

|   |            |           |           |
|---|------------|-----------|-----------|
| F | 14.583108  | 2.198757  | -0.642807 |
| S | -5.391177  | 0.606955  | 0.052214  |
| S | 5.262742   | -1.725802 | -0.03732  |
| C | -8.010976  | -0.905382 | -0.092701 |
| H | -8.370759  | -1.923623 | -0.177569 |
| C | -8.984705  | 0.070919  | -0.0232   |
| C | -10.430758 | -0.135329 | -0.052439 |
| C | -8.738933  | 1.52272   | 0.086105  |
| C | -11.066759 | 1.207393  | 0.028001  |
| C | -10.058937 | 2.18195   | 0.111772  |
| C | -12.40378  | 1.603566  | 0.031003  |
| C | -12.66214  | 2.966868  | 0.119038  |
| H | -13.237685 | 0.922011  | -0.030874 |
| C | -10.340353 | 3.537599  | 0.199812  |
| C | -11.672283 | 3.941116  | 0.203716  |
| H | -9.53603   | 4.260073  | 0.263337  |
| H | -11.956012 | 4.983531  | 0.269885  |
| C | -11.130418 | -1.324589 | -0.133509 |
| C | -12.552876 | -1.401096 | -0.153916 |
| N | -13.703429 | -1.520725 | -0.175179 |
| C | -10.52643  | -2.613069 | -0.203835 |
| N | -10.088776 | -3.682778 | -0.26242  |
| O | -7.656332  | 2.090688  | 0.144321  |
| F | -13.949869 | 3.363932  | 0.122421  |

**Table S2:** Cartesian coordinates of **NBD1** compound.

| Atoms | X-axis    | Y-axis    | Z-axis    |
|-------|-----------|-----------|-----------|
| C     | -2.160013 | -2.180351 | -0.139343 |
| C     | -0.825699 | -2.47144  | -0.147357 |
| C     | 0.138902  | -1.424415 | -0.048407 |
| C     | -0.304583 | -0.05726  | 0.060033  |
| C     | -1.690264 | 0.220766  | 0.067285  |
| H     | 1.859378  | -2.73077  | -0.136311 |
| H     | -0.472471 | -3.494311 | -0.228701 |
| C     | 1.524521  | -1.702583 | -0.054664 |
| C     | 0.660026  | 0.989897  | 0.157966  |
| H     | -2.024416 | 1.249122  | 0.149845  |
| C     | 2.429292  | -0.664517 | 0.042403  |
| H     | 0.30681   | 2.01278   | 0.23875   |
| C     | 1.99454   | 0.699544  | 0.149651  |
| C     | 3.19118   | 1.653356  | 0.243084  |
| C     | 4.346057  | 0.66107   | 0.175918  |

|   |           |           |           |
|---|-----------|-----------|-----------|
| C | -2.59633  | -0.816741 | -0.030237 |
| C | -4.507791 | -2.138544 | -0.16654  |
| C | -3.356501 | -3.134278 | -0.234538 |
| C | -4.040085 | -0.833867 | -0.049412 |
| C | -5.894411 | -2.260127 | -0.194278 |
| C | -6.616216 | -1.058849 | -0.099972 |
| H | -6.417725 | -3.205436 | -0.282147 |
| C | 3.871533  | -0.642145 | 0.063054  |
| C | 5.734239  | 0.806086  | 0.203863  |
| C | 6.453643  | -0.388951 | 0.112061  |
| H | 6.255369  | 1.748571  | 0.285614  |
| C | 7.832966  | -0.703775 | 0.114316  |
| C | 8.982142  | 0.066158  | 0.124417  |
| C | 9.083486  | 1.543999  | 0.017897  |
| C | 10.346188 | -0.468696 | 0.130198  |
| C | 10.52353  | 1.852932  | -0.138661 |
| C | 11.271866 | 0.669531  | -0.090739 |
| H | 8.010888  | -1.771035 | 0.084103  |
| C | 12.660944 | 0.732569  | -0.232928 |
| C | 13.235892 | 1.979554  | -0.415831 |
| C | 12.473323 | 3.151098  | -0.454196 |
| C | 11.098167 | 3.102304  | -0.31465  |
| H | 13.310966 | -0.128575 | -0.214756 |
| H | 10.502953 | 4.006146  | -0.344445 |
| C | 10.755649 | -1.770083 | 0.353758  |
| C | 9.885128  | -2.850576 | 0.677957  |
| N | 9.229272  | -3.763084 | 0.954431  |
| C | 12.120266 | -2.178057 | 0.319024  |
| N | 13.212272 | -2.55963  | 0.298111  |
| C | 3.19352   | 2.430252  | 1.577422  |
| H | 3.168127  | 1.748879  | 2.430567  |
| H | 4.091519  | 3.048278  | 1.656105  |
| H | 2.323075  | 3.088462  | 1.636145  |
| C | 3.226949  | 2.635822  | -0.947924 |
| H | 2.360421  | 3.301248  | -0.920317 |
| H | 4.128335  | 3.252493  | -0.905518 |
| H | 3.219955  | 2.101076  | -1.900159 |
| C | -3.391868 | -4.118198 | 0.955236  |
| H | -4.291624 | -4.73737  | 0.911497  |
| H | -2.524192 | -4.782184 | 0.928194  |
| H | -3.387119 | -3.584547 | 1.908093  |
| C | -3.357157 | -3.909871 | -1.569587 |
| H | -3.331827 | -3.227581 | -2.422013 |

|   |            |           |           |
|---|------------|-----------|-----------|
| H | -2.486247  | -4.567464 | -1.628738 |
| H | -4.254264  | -4.529165 | -1.650172 |
| O | 8.195551   | 2.380581  | 0.033932  |
| F | 14.564461  | 2.083775  | -0.562082 |
| S | -5.409431  | 0.43416   | 0.042259  |
| S | 5.244661   | -1.888358 | -0.01837  |
| C | -8.028029  | -1.078602 | -0.116481 |
| H | -8.387963  | -2.096344 | -0.20635  |
| C | -9.002402  | -0.102358 | -0.045754 |
| C | -10.44935  | -0.308437 | -0.079269 |
| C | -8.756228  | 1.346318  | 0.071174  |
| C | -11.085289 | 1.031416  | 0.007271  |
| C | -10.079705 | 2.004907  | 0.098063  |
| C | -12.423994 | 1.430867  | 0.010178  |
| C | -12.694763 | 2.78664   | 0.104813  |
| H | -13.259049 | 0.750644  | -0.057084 |
| C | -10.34922  | 3.361407  | 0.19366   |
| C | -11.679025 | 3.742797  | 0.196077  |
| H | -9.559402  | 4.0986    | 0.263501  |
| C | -11.147937 | -1.497632 | -0.168574 |
| C | -12.570387 | -1.571862 | -0.189796 |
| N | -13.721611 | -1.684935 | -0.210405 |
| C | -10.543797 | -2.785487 | -0.246487 |
| N | -10.106029 | -3.854727 | -0.311643 |
| O | -7.677789  | 1.919803  | 0.134633  |
| F | -13.966484 | 3.210523  | 0.110635  |
| F | 13.104033  | 4.319438  | -0.631402 |
| F | -12.021587 | 5.034621  | 0.285419  |

**Table S3:** Cartesian coordinates of **NBD2** compound.

| Atoms | X-axis    | Y-axis    | Z-axis    |
|-------|-----------|-----------|-----------|
| C     | -2.178446 | -2.453772 | -0.159041 |
| C     | -0.842762 | -2.738344 | -0.165162 |
| C     | 0.11629   | -1.687583 | -0.052322 |
| C     | -0.33413  | -0.323554 | 0.068426  |
| C     | -1.720931 | -0.052248 | 0.073146  |
| H     | 1.843369  | -2.984512 | -0.147351 |
| H     | -0.484268 | -3.758616 | -0.255171 |
| C     | 1.50308   | -1.958933 | -0.056354 |
| C     | 0.62482   | 0.727303  | 0.18112   |
| H     | -2.06043  | 0.973556  | 0.164694  |
| C     | 2.402355  | -0.917311 | 0.055102  |

|   |           |           |           |
|---|-----------|-----------|-----------|
| H | 0.266282  | 1.747522  | 0.271097  |
| C | 1.960675  | 0.443489  | 0.175336  |
| C | 3.152052  | 1.402015  | 0.284385  |
| C | 4.312     | 0.416189  | 0.211468  |
| C | -2.621528 | -1.093313 | -0.038141 |
| C | -4.526242 | -2.422912 | -0.194068 |
| C | -3.369945 | -3.412414 | -0.267601 |
| C | -4.064739 | -1.116534 | -0.062713 |
| C | -5.911394 | -2.55021  | -0.227707 |
| C | -6.639188 | -1.35214  | -0.124796 |
| H | -6.430581 | -3.496746 | -0.325925 |
| C | 3.844062  | -0.888646 | 0.081754  |
| C | 5.698524  | 0.567183  | 0.247624  |
| C | 6.424379  | -0.624168 | 0.145452  |
| H | 6.214942  | 1.510977  | 0.342632  |
| C | 7.803785  | -0.932032 | 0.151165  |
| C | 8.950251  | -0.155748 | 0.178354  |
| C | 9.043034  | 1.323001  | 0.08937   |
| C | 10.315723 | -0.685056 | 0.189024  |
| C | 10.484158 | 1.640452  | -0.053559 |
| C | 11.237865 | 0.461342  | -0.014028 |
| H | 7.987855  | -1.997805 | 0.107381  |
| C | 12.622603 | 0.539183  | -0.149637 |
| C | 13.214002 | 1.79263   | -0.317194 |
| C | 12.441694 | 2.965277  | -0.345759 |
| C | 11.057571 | 2.887482  | -0.211847 |
| H | 13.262133 | -0.328764 | -0.136417 |
| H | 10.446307 | 3.78027   | -0.23301  |
| C | 10.730363 | -1.986041 | 0.404897  |
| C | 9.862179  | -3.073115 | 0.713072  |
| N | 9.207677  | -3.990384 | 0.976589  |
| C | 12.097112 | -2.387335 | 0.378524  |
| N | 13.190744 | -2.764493 | 0.364267  |
| C | 3.144775  | 2.164304  | 1.627123  |
| H | 3.118912  | 1.473605  | 2.472711  |
| H | 4.039361  | 2.785765  | 1.716486  |
| H | 2.270892  | 2.817611  | 1.689046  |
| C | 3.188102  | 2.397462  | -0.895832 |
| H | 2.317856  | 3.057839  | -0.864924 |
| H | 4.085905  | 3.018466  | -0.842604 |
| H | 3.18829   | 1.873086  | -1.853833 |
| C | -3.404561 | -4.407812 | 0.912638  |
| H | -4.300803 | -5.031309 | 0.859645  |

|    |              |           |           |
|----|--------------|-----------|-----------|
| H  | -2.533242    | -5.066839 | 0.882367  |
| H  | -3.406099    | -3.883346 | 1.870582  |
| C  | -3.362401    | -4.175045 | -1.610091 |
| H  | -3.337408    | -3.484481 | -2.455827 |
| H  | -2.488163    | -4.827871 | -1.672507 |
| H  | -4.256236    | -4.797777 | -1.699686 |
| O  | 8.151381     | 2.155348  | 0.107996  |
| S  | -5.43893500  | 0.144877  | 0.035495  |
| S  | 5.22256400   | -2.127601 | -0.007968 |
| C  | -8.049444    | -1.377967 | -0.145753 |
| H  | -8.40526     | -2.396283 | -0.244954 |
| C  | -9.029134    | -0.405168 | -0.070954 |
| C  | -10.47436    | -0.61796  | -0.110675 |
| C  | -8.786963    | 1.042654  | 0.053647  |
| C  | -11.115695   | 0.721077  | -0.024925 |
| C  | -10.114372   | 1.696709  | 0.074757  |
| C  | -12.449732   | 1.121521  | -0.029948 |
| C  | -12.74618    | 2.482882  | 0.065919  |
| H  | -13.269857   | 0.42561   | -0.105833 |
| C  | -10.394295   | 3.046122  | 0.171671  |
| C  | -11.729022   | 3.445313  | 0.167641  |
| H  | -9.597683    | 3.774665  | 0.248116  |
| C  | -11.168448   | -1.809583 | -0.20239  |
| C  | -12.59044    | -1.890025 | -0.228853 |
| N  | -13.74094    | -2.009307 | -0.253822 |
| C  | -10.558532   | -3.094949 | -0.276422 |
| N  | -10.115284   | -4.162096 | -0.338369 |
| O  | -7.711246    | 1.61997   | 0.125956  |
| Cl | 14.94822700  | 1.860421  | -0.490976 |
| Cl | 13.17845600  | 4.531464  | -0.549031 |
| Cl | -12.09710200 | 5.144345  | 0.289047  |
| Cl | -14.42507100 | 2.954791  | 0.055079  |

**Table S4:** Cartesian coordinates of **NBD3** compound.

| Atoms | X-axis    | Y-axis    | Z-axis    |
|-------|-----------|-----------|-----------|
| C     | -2.169418 | -2.355205 | -0.154472 |
| C     | -0.83422  | -2.641065 | -0.160891 |
| C     | 0.125385  | -1.591224 | -0.04426  |
| C     | -0.323088 | -0.226494 | 0.081334  |
| C     | -1.70902  | 0.046239  | 0.086691  |
| H     | 1.850636  | -2.889466 | -0.144753 |
| H     | -0.476398 | -3.661144 | -0.25442  |

|   |           |           |           |
|---|-----------|-----------|-----------|
| C | 1.511214  | -1.864034 | -0.049962 |
| C | 0.63657   | 0.82345   | 0.197265  |
| H | -2.047731 | 1.071911  | 0.181527  |
| C | 2.411426  | -0.822892 | 0.06424   |
| H | 0.2788    | 1.843515  | 0.290739  |
| C | 1.971999  | 0.53836   | 0.189505  |
| C | 3.164369  | 1.495238  | 0.300007  |
| C | 4.322912  | 0.508331  | 0.22176   |
| C | -2.610471 | -0.994286 | -0.028986 |
| C | -4.516534 | -2.321752 | -0.192966 |
| C | -3.361445 | -3.312258 | -0.267547 |
| C | -4.052653 | -1.014303 | -0.055508 |
| C | -5.899279 | -2.446179 | -0.230453 |
| C | -6.62623  | -1.244689 | -0.124219 |
| H | -6.420642 | -3.390863 | -0.333998 |
| C | 3.85211   | -0.79766  | 0.088488  |
| C | 5.707373  | 0.656059  | 0.254647  |
| C | 6.431515  | -0.539029 | 0.145775  |
| H | 6.225697  | 1.598589  | 0.351222  |
| C | 7.80629   | -0.847816 | 0.144749  |
| C | 8.956488  | -0.069453 | 0.167078  |
| C | 9.046143  | 1.404093  | 0.071365  |
| C | 10.318154 | -0.599952 | 0.175276  |
| C | 10.49065  | 1.724199  | -0.082683 |
| C | 11.243996 | 0.545304  | -0.04308  |
| H | 7.991386  | -1.91322  | 0.096412  |
| C | 12.627513 | 0.617375  | -0.195135 |
| C | 13.22253  | 1.873014  | -0.377767 |
| C | 12.443949 | 3.056038  | -0.402496 |
| C | 11.056007 | 2.973248  | -0.252405 |
| H | 13.262323 | -0.254269 | -0.184483 |
| H | 10.437562 | 3.861239  | -0.271251 |
| C | 10.736964 | -1.896704 | 0.40425   |
| C | 9.869191  | -2.978397 | 0.733067  |
| N | 9.213725  | -3.889586 | 1.013675  |
| C | 12.103338 | -2.299198 | 0.373443  |
| N | 13.196628 | -2.676648 | 0.356094  |
| C | 3.160248  | 2.252748  | 1.645523  |
| H | 3.135618  | 1.559351  | 2.488893  |
| H | 4.055143  | 2.87362   | 1.735012  |
| H | 2.286831  | 2.906184  | 1.710999  |
| C | 3.19981   | 2.494346  | -0.877239 |
| H | 2.330138  | 3.155158  | -0.842729 |



|   |            |           |           |
|---|------------|-----------|-----------|
| H | 4.09798    | 3.114596  | -0.822973 |
| H | 3.198247   | 1.973257  | -1.836994 |
| C | -3.399291  | -4.310379 | 0.910439  |
| H | -4.295905  | -4.932907 | 0.854105  |
| H | -2.528541  | -4.969995 | 0.879718  |
| H | -3.401916  | -3.788422 | 1.869713  |
| C | -3.352973  | -4.071184 | -1.612151 |
| H | -3.326247  | -3.37862  | -2.456151 |
| H | -2.479213  | -4.724491 | -1.674762 |
| H | -4.247053  | -4.693061 | -1.704245 |
| O | 8.160606   | 2.242023  | 0.089402  |
| S | 5.42196400 | 0.249774  | 0.045299  |
| S | 5.22517000 | -2.039661 | -0.008973 |
| C | -8.032239  | -1.268409 | -0.149711 |
| H | -8.391258  | -2.284882 | -0.255348 |
| C | -9.012953  | -0.290897 | -0.072649 |
| C | -10.455351 | -0.501657 | -0.117963 |
| C | -8.765496  | 1.150401  | 0.061702  |
| C | -11.097727 | 0.840362  | -0.02529  |
| C | -10.094396 | 1.812348  | 0.084537  |
| C | -12.432029 | 1.240584  | -0.032504 |
| C | -12.729255 | 2.606422  | 0.07377   |
| H | -13.25006  | 0.543118  | -0.117186 |
| C | -10.36356  | 3.163052  | 0.191767  |
| C | -11.700856 | 3.573093  | 0.18766   |
| H | -9.559825  | 3.882936  | 0.276194  |
| C | -11.155628 | -1.688327 | -0.218423 |
| C | -12.577872 | -1.764751 | -0.248281 |
| N | -13.72843  | -1.881045 | -0.276167 |
| C | -10.549061 | -2.975191 | -0.298709 |
| N | -10.10744  | -4.042437 | -0.365959 |
| O | -7.692666  | 1.730854  | 0.140739  |
| C | 13.06287   | 4.331206  | -0.582654 |
| N | 13.548636  | 5.368522  | -0.727025 |
| C | 14.641272  | 1.944918  | -0.541525 |
| N | 15.786991  | 1.994495  | -0.673518 |
| C | -12.016469 | 4.962093  | 0.298244  |
| N | -12.255866 | 6.087841  | 0.388783  |
| C | -14.099554 | 3.01511   | 0.065641  |
| N | -15.208161 | 3.336786  | 0.058229  |

**Table S5:** Cartesian coordinates of **NBD4** compound.

| <b>Atoms</b> | <b>X-axis</b> | <b>Y-axis</b> | <b>Z-axis</b> |
|--------------|---------------|---------------|---------------|
| C            | 2.187009      | -2.639274     | 0.179363      |
| C            | 0.850609      | -2.919614     | 0.17892       |
| C            | -0.103667     | -1.867346     | 0.04154       |
| C            | 0.351497      | -0.506079     | -0.097554     |
| C            | 1.738433      | -0.239098     | -0.095863     |
| H            | -1.835232     | -3.156937     | 0.144512      |
| H            | 0.487878      | -3.93699      | 0.282268      |
| C            | -1.490642     | -2.134225     | 0.039706      |
| C            | -0.602582     | 0.546428      | -0.233783     |
| H            | 2.082154      | 0.783868      | -0.201101     |
| C            | -2.385451     | -1.090662     | -0.094269     |
| H            | -0.239764     | 1.563772      | -0.336706     |
| C            | -1.939172     | 0.267084      | -0.232847     |
| C            | -3.126158     | 1.227793      | -0.364002     |
| C            | -4.289668     | 0.247302      | -0.280852     |
| C            | 2.634491      | -1.28188      | 0.039667      |
| C            | 4.534107      | -2.61482      | 0.233214      |
| C            | 3.374308      | -3.59945      | 0.313926      |
| C            | 4.076162      | -1.307233     | 0.075975      |
| C            | 5.915944      | -2.743838     | 0.279849      |
| C            | 6.648071      | -1.546184     | 0.161928      |
| H            | 6.433383      | -3.688985     | 0.397759      |
| C            | -3.825767     | -1.059457     | -0.129148     |
| C            | -5.672901     | 0.401004      | -0.322895     |
| C            | -6.403369     | -0.789576     | -0.20378      |
| H            | -6.185776     | 1.344988      | -0.43278      |
| C            | -7.779341     | -1.09031      | -0.206164     |
| C            | -8.924511     | -0.304059     | -0.235552     |
| C            | -9.004505     | 1.169495      | -0.13859      |
| C            | -10.288895    | -0.826169     | -0.246696     |
| C            | -10.448268    | 1.497518      | 0.012937      |
| C            | -11.207299    | 0.324558      | -0.026091     |
| H            | -7.972008     | -2.154208     | -0.152313     |
| C            | -12.593071    | 0.405982      | 0.119922      |
| C            | -13.162349    | 1.660235      | 0.302076      |
| C            | -12.385361    | 2.822285      | 0.34521       |
| C            | -11.008993    | 2.749975      | 0.191327      |
| H            | -13.246572    | -0.45176      | 0.096164      |
| H            | -10.398447    | 3.642305      | 0.230334      |
| C            | -10.717338    | -2.118609     | -0.479065     |
| C            | -9.856835     | -3.205044     | -0.81152      |
| N            | -9.206854     | -4.119083     | -1.095248     |

|    |            |           |           |
|----|------------|-----------|-----------|
| C  | -12.087127 | -2.509467 | -0.448108 |
| N  | -13.184288 | -2.8753   | -0.430877 |
| C  | -3.109383  | 1.967224  | -1.719521 |
| H  | -3.082239  | 1.262491  | -2.553361 |
| H  | -4.000703  | 2.590943  | -1.823447 |
| H  | -2.232488  | 2.615688  | -1.787746 |
| C  | -3.164732  | 2.242663  | 0.799559  |
| H  | -2.29135   | 2.8984    | 0.762306  |
| H  | -4.059186  | 2.866798  | 0.730719  |
| H  | -3.172592  | 1.734491  | 1.766185  |
| C  | 3.415667   | -4.614682 | -0.849158 |
| H  | 4.308777   | -5.24064  | -0.777481 |
| H  | 2.541488   | -5.269566 | -0.814958 |
| H  | 3.427531   | -4.106796 | -1.815883 |
| C  | 3.353684   | -4.338696 | 1.669405  |
| H  | 3.324131   | -3.633793 | 2.503031  |
| H  | 2.476822   | -4.987464 | 1.735631  |
| H  | 4.244555   | -4.962723 | 1.776604  |
| O  | -8.11551   | 2.0032    | -0.153098 |
| Se | 5.450056   | -0.049485 | -0.032657 |
| Se | -5.204948  | -2.293986 | -0.025747 |
| C  | 8.053412   | -1.574423 | 0.192198  |
| H  | 8.409414   | -2.590516 | 0.311388  |
| C  | 9.03758    | -0.600515 | 0.106253  |
| C  | 10.478834  | -0.815766 | 0.156153  |
| C  | 8.794762   | 0.839929  | -0.04006  |
| C  | 11.125133  | 0.524034  | 0.059201  |
| C  | 10.126915  | 1.496698  | -0.064852 |
| C  | 12.462645  | 0.92123   | 0.064936  |
| C  | 12.747254  | 2.276578  | -0.051282 |
| H  | 13.288964  | 0.232898  | 0.147197  |
| C  | 10.403352  | 2.847986  | -0.175592 |
| C  | 11.735276  | 3.234928  | -0.161101 |
| H  | 9.61337    | 3.583086  | -0.253854 |
| C  | 11.177422  | -2.002378 | 0.26172   |
| C  | 12.59967   | -2.078123 | 0.295364  |
| N  | 13.750344  | -2.191988 | 0.325485  |
| C  | 10.568789  | -3.288255 | 0.34234   |
| N  | 10.124547  | -4.354312 | 0.409741  |
| O  | 7.725548   | 1.425153  | -0.125877 |
| N  | -12.966731 | 4.144257  | 0.659886  |
| O  | -13.811161 | 4.186034  | 1.539127  |
| O  | -12.521074 | 5.101278  | 0.048384  |

|   |            |          |           |
|---|------------|----------|-----------|
| N | -14.640763 | 1.717462 | 0.346196  |
| O | -15.17969  | 2.603375 | -0.296108 |
| O | -15.209945 | 0.848444 | 0.985159  |
| N | 12.023308  | 4.684607 | -0.162577 |
| O | 12.873643  | 5.084201 | 0.615228  |
| O | 11.35217   | 5.378042 | -0.908989 |
| N | 14.176305  | 2.647746 | -0.156387 |
| O | 14.955441  | 2.065172 | 0.578917  |
| O | 14.471989  | 3.47645  | -1.001286 |

**Table S6:** Cartesian coordinates of **NBD5** compound.

| <b>Atoms</b> | <b>X-axis</b> | <b>Y-axis</b> | <b>Z-axis</b> |
|--------------|---------------|---------------|---------------|
| C            | 2.205403      | -2.894874     | 0.183334      |
| C            | 0.86798       | -3.170565     | 0.184852      |
| C            | -0.082953     | -2.115474     | 0.046966      |
| C            | 0.377057      | -0.756394     | -0.094717     |
| C            | 1.765359      | -0.494258     | -0.094345     |
| H            | -1.818884     | -3.399241     | 0.153352      |
| H            | 0.502039      | -4.186678     | 0.289867      |
| C            | -1.47113      | -2.377759     | 0.046522      |
| C            | -0.573966     | 0.29871       | -0.232667     |
| H            | 2.112438      | 0.527449      | -0.201303     |
| C            | -2.362575     | -1.332054     | -0.089319     |
| H            | -0.208095     | 1.314788      | -0.337905     |
| C            | -1.911604     | 0.023643      | -0.231113     |
| C            | -3.095897     | 0.987586      | -0.365266     |
| C            | -4.262677     | 0.010749      | -0.281356     |
| C            | 2.658071      | -1.539505     | 0.04171       |
| C            | 4.552694      | -2.879175     | 0.234603      |
| C            | 3.38929       | -3.859364     | 0.317215      |
| C            | 4.100424      | -1.571123     | 0.076923      |
| C            | 5.935376      | -3.014473     | 0.280266      |
| C            | 6.672091      | -1.821653     | 0.161728      |
| H            | 6.448241      | -3.962145     | 0.398286      |
| C            | -3.803318     | -1.295545     | -0.125036     |
| C            | -5.646866     | 0.168721      | -0.327799     |
| C            | -6.380594     | -1.017798     | -0.20713      |
| H            | -6.157215     | 1.113532      | -0.443067     |
| C            | -7.759566     | -1.316558     | -0.21242      |
| C            | -8.902245     | -0.531688     | -0.256899     |
| C            | -8.984652     | 0.94669       | -0.192283     |
| C            | -10.269216    | -1.052186     | -0.263075     |

|   |             |           |           |
|---|-------------|-----------|-----------|
| C | -10.427354  | 1.27536   | -0.053976 |
| C | -11.184976  | 0.105629  | -0.074134 |
| H | -7.952207   | -2.37989  | -0.148562 |
| C | -12.568501  | 0.19948   | 0.070633  |
| C | -13.166213  | 1.452757  | 0.227937  |
| C | -12.383715  | 2.629081  | 0.222756  |
| C | -10.999866  | 2.525763  | 0.085163  |
| H | -13.199931  | -0.67306  | 0.07678   |
| H | -10.374589  | 3.407721  | 0.084795  |
| C | -10.696183  | -2.349802 | -0.468123 |
| C | -9.835265   | -3.446374 | -0.76456  |
| N | -9.185649   | -4.369652 | -1.018125 |
| C | -12.066569  | -2.739817 | -0.442895 |
| N | -13.162144  | -3.11082  | -0.430239 |
| C | -3.075463   | 1.724685  | -1.721927 |
| H | -3.049174   | 1.018312  | -2.554433 |
| H | -3.965151   | 2.350412  | -1.828186 |
| H | -2.196817   | 2.370829  | -1.790501 |
| C | -3.132466   | 2.004816  | 0.79627   |
| H | -2.256909   | 2.657734  | 0.75901   |
| H | -4.024955   | 2.631617  | 0.725411  |
| H | -3.143089   | 1.498347  | 1.763788  |
| C | 3.425231    | -4.875527 | -0.845211 |
| H | 4.315975    | -5.505024 | -0.774317 |
| H | 2.548443    | -5.526939 | -0.809933 |
| H | 3.438146    | -4.368128 | -1.812205 |
| C | 3.367302    | -4.597984 | 1.672971  |
| H | 3.341167    | -3.892464 | 2.506215  |
| H | 2.488202    | -5.243648 | 1.740674  |
| H | 4.256125    | -5.225078 | 1.779731  |
| O | -8.091524   | 1.776239  | -0.223517 |
| S | 5.48175800  | -0.319922 | -0.033219 |
| S | -5.18787900 | -2.52503  | -0.019898 |
| C | 8.079643    | -1.856153 | 0.192511  |
| H | 8.429494    | -2.874518 | 0.310829  |
| C | 9.067108    | -0.888755 | 0.109605  |
| C | 10.508959   | -1.10992  | 0.162189  |
| C | 8.833732    | 0.556512  | -0.034322 |
| C | 11.158784   | 0.228264  | 0.07298   |
| C | 10.168462   | 1.203823  | -0.047561 |
| C | 12.493614   | 0.628122  | 0.095053  |
| C | 12.814131   | 1.985086  | -0.005278 |
| H | 13.297621   | -0.081561 | 0.195601  |

|   |            |           |           |
|---|------------|-----------|-----------|
| C | 10.463994  | 2.549574  | -0.156518 |
| C | 11.798126  | 2.95649   | -0.143345 |
| H | 9.665044   | 3.271394  | -0.254114 |
| C | 11.199228  | -2.301967 | 0.262085  |
| C | 12.621017  | -2.389035 | 0.295998  |
| N | 13.77023   | -2.5174   | 0.326929  |
| C | 10.583007  | -3.584786 | 0.335062  |
| N | 10.133225  | -4.649031 | 0.396285  |
| O | 7.764958   | 1.142785  | -0.125258 |
| C | 12.059698  | 4.449982  | -0.233868 |
| C | 14.295575  | 2.326665  | -0.00609  |
| C | -12.950673 | 4.025396  | 0.411609  |
| C | -14.681638 | 1.463679  | 0.350798  |
| F | -14.064092 | 4.238417  | -0.314413 |
| F | -13.253238 | 4.26984   | 1.703398  |
| F | -12.058579 | 4.966961  | 0.039317  |
| F | -15.271167 | 1.834987  | -0.804274 |
| F | -15.114577 | 2.298098  | 1.315134  |
| F | -15.161363 | 0.240282  | 0.654075  |
| F | 13.067784  | 4.751806  | -1.073432 |
| F | 14.742874  | 2.592486  | -1.250616 |
| F | 14.579453  | 3.393663  | 0.76494   |
| F | 15.038422  | 1.303141  | 0.461685  |
| F | 12.359652  | 4.978118  | 0.970614  |
| F | 10.97081   | 5.107819  | -0.683832 |

**Table S7:** Cartesian coordinates of **NBD6** compound.

| <b>Atoms</b> | <b>X-axis</b> | <b>Y-axis</b> | <b>Z-axis</b> |
|--------------|---------------|---------------|---------------|
| C            | 2.212765      | -3.101562     | 0.19305       |
| C            | 0.874544      | -3.372873     | 0.189487      |
| C            | -0.072342     | -2.313589     | 0.055985      |
| C            | 0.392017      | -0.954568     | -0.074389     |
| C            | 1.780729      | -0.696919     | -0.069562     |
| H            | -1.812314     | -3.592799     | 0.145516      |
| H            | 0.504924      | -4.388355     | 0.286669      |
| C            | -1.460962     | -2.571661     | 0.048213      |
| C            | -0.55506      | 0.104878      | -0.206548     |
| H            | 2.131516      | 0.324223      | -0.168936     |
| C            | -2.348587     | -1.521809     | -0.083094     |
| H            | -0.185544     | 1.120486      | -0.302443     |
| C            | -1.893418     | -0.166035     | -0.211471     |
| C            | -3.074198     | 0.802604      | -0.341569     |

|   |            |           |           |
|---|------------|-----------|-----------|
| C | -4.243912  | -0.171732 | -0.272478 |
| C | 2.669656   | -1.746579 | 0.060647  |
| C | 4.559769   | -3.0942   | 0.246505  |
| C | 3.393048   | -4.070753 | 0.323516  |
| C | 4.111107   | -1.782299 | 0.096249  |
| C | 5.940348   | -3.233632 | 0.290879  |
| C | 6.681296   | -2.04066  | 0.178004  |
| H | 6.450948   | -4.183111 | 0.403686  |
| C | -3.788489  | -1.481881 | -0.126039 |
| C | -5.626123  | -0.010244 | -0.324944 |
| C | -6.363775  | -1.197672 | -0.221205 |
| H | -6.132898  | 0.937267  | -0.432711 |
| C | -7.741157  | -1.492523 | -0.243303 |
| C | -8.882599  | -0.701966 | -0.287487 |
| C | -8.958008  | 0.771719  | -0.187528 |
| C | -10.249666 | -1.217718 | -0.327144 |
| C | -10.403521 | 1.103801  | -0.067497 |
| C | -11.16632  | -0.060207 | -0.129786 |
| H | -7.938518  | -2.555889 | -0.19741  |
| C | -12.554554 | 0.033225  | -0.009563 |
| C | -13.142959 | 1.285312  | 0.164622  |
| C | -12.351174 | 2.452599  | 0.213755  |
| C | -10.966503 | 2.355824  | 0.102794  |
| H | -13.202479 | -0.829027 | -0.038583 |
| H | -10.340714 | 3.236539  | 0.161482  |
| C | -10.680008 | -2.507821 | -0.565251 |
| C | -9.817404  | -3.601052 | -0.870036 |
| N | -9.165738  | -4.52036  | -1.13192  |
| C | -12.051656 | -2.894432 | -0.569021 |
| N | -13.146596 | -3.266719 | -0.58152  |
| C | -3.045863  | 1.552666  | -1.690978 |
| H | -3.017295  | 0.854467  | -2.530259 |
| H | -3.933573  | 2.181521  | -1.795029 |
| H | -2.165503  | 2.197444  | -1.748985 |
| C | -3.113154  | 1.808451  | 0.829821  |
| H | -2.235607  | 2.459089  | 0.802537  |
| H | -4.00349   | 2.438489  | 0.761057  |
| H | -3.129464  | 1.292677  | 1.792296  |
| C | 3.426777   | -5.081924 | -0.843281 |
| H | 4.314839   | -5.715273 | -0.77374  |
| H | 2.547407   | -5.729941 | -0.811668 |
| H | 3.44289    | -4.570575 | -1.808117 |
| C | 3.367461   | -4.814836 | 1.676328  |

|    |            |           |           |
|----|------------|-----------|-----------|
| H  | 3.342734   | -4.112805 | 2.51253   |
| H  | 2.486206   | -5.457862 | 1.740219  |
| H  | 4.254095   | -5.445264 | 1.781139  |
| O  | -8.065384  | 1.60189   | -0.180413 |
| Se | 5.494022   | -0.534186 | -0.008091 |
| Se | -5.175035  | -2.709436 | -0.04196  |
| C  | 8.08591    | -2.079781 | 0.207867  |
| H  | 8.434087   | -3.099146 | 0.321839  |
| C  | 9.077884   | -1.112812 | 0.12678   |
| C  | 10.517206  | -1.339169 | 0.17789   |
| C  | 8.84614    | 0.329295  | -0.015595 |
| C  | 11.173164  | -0.002908 | 0.081481  |
| C  | 10.184718  | 0.97517   | -0.0364   |
| C  | 12.514271  | 0.38702   | 0.091283  |
| C  | 12.820566  | 1.742078  | -0.012204 |
| H  | 13.328865  | -0.315993 | 0.173902  |
| C  | 10.472954  | 2.325139  | -0.145178 |
| C  | 11.807474  | 2.714585  | -0.138084 |
| H  | 9.681378   | 3.058548  | -0.228665 |
| C  | 11.207057  | -2.530178 | 0.286811  |
| C  | 12.628612  | -2.618953 | 0.323449  |
| N  | 13.777396  | -2.749112 | 0.357528  |
| C  | 10.588146  | -3.811141 | 0.370571  |
| N  | 10.135653  | -4.873495 | 0.440816  |
| O  | 7.78239    | 0.924162  | -0.10135  |
| O  | -14.117173 | 4.089275  | 1.373519  |
| O  | -11.8322   | 4.978373  | 0.804633  |
| O  | -15.479745 | 2.228274  | -0.681099 |
| O  | -15.378185 | -0.139875 | 0.183101  |
| O  | 13.113164  | 4.821493  | 0.789928  |
| O  | 10.837335  | 5.186232  | -0.221245 |
| O  | 15.347302  | 0.901941  | -0.011976 |
| O  | 14.80811   | 3.099521  | -1.113713 |
| O  | -15.271265 | 1.6976    | 1.766468  |
| O  | -13.563786 | 4.579959  | -0.949308 |
| O  | 12.728389  | 4.718982  | -1.683294 |
| O  | 14.849704  | 2.840189  | 1.37693   |
| H  | 14.368096  | 3.702516  | 1.388794  |
| H  | 13.610386  | 4.275534  | -1.717888 |
| H  | -12.859021 | 4.955575  | -1.503378 |
| H  | -15.044449 | 2.651534  | 1.855598  |
| S  | -14.963183 | 1.246133  | 0.255612  |
| S  | -12.966072 | 4.134563  | 0.480652  |



|   |           |          |           |
|---|-----------|----------|-----------|
| S | 12.106577 | 4.497071 | -0.22655  |
| S | 14.590769 | 2.131438 | -0.033314 |

**Table S8:** Cartesian coordinates of **NBD7** compound.

| <b>Atoms</b> | <b>X-axis</b> | <b>Y-axis</b> | <b>Z-axis</b> |
|--------------|---------------|---------------|---------------|
| C            | -2.213583     | -2.927526     | -0.139369     |
| C            | -0.87588      | -3.202333     | -0.135299     |
| C            | 0.075067      | -2.142478     | -0.040282     |
| C            | -0.385673     | -0.779683     | 0.052431      |
| C            | -1.774428     | -0.518431     | 0.045373      |
| H            | 1.811804      | -3.428238     | -0.105413     |
| H            | -0.509661     | -4.221552     | -0.203207     |
| C            | 1.463699      | -2.40371      | -0.034564     |
| C            | 0.565168      | 0.280001      | 0.150187      |
| H            | -2.121752     | 0.506462      | 0.114893      |
| C            | 2.35497       | -1.353595     | 0.060972      |
| H            | 0.198927      | 1.299043      | 0.219979      |
| C            | 1.903068      | 0.00585       | 0.155707      |
| C            | 3.087064      | 0.974744      | 0.253754      |
| C            | 4.254362      | -0.00376      | 0.202035      |
| C            | -2.666999     | -1.56805      | -0.04887      |
| C            | -4.561263     | -2.91471      | -0.182746     |
| C            | -3.397661     | -3.897118     | -0.230756     |
| C            | -4.109939     | -1.60229      | -0.078651     |
| C            | -5.945257     | -3.05323      | -0.217239     |
| C            | -6.682174     | -1.858606     | -0.143664     |
| H            | -6.457005     | -4.00582      | -0.293399     |
| C            | 3.796157      | -1.314176     | 0.091438      |
| C            | 5.639231      | 0.15764       | 0.241392      |
| C            | 6.374161      | -1.030231     | 0.159043      |
| H            | 6.148573      | 1.106368      | 0.324961      |
| C            | 7.755144      | -1.327639     | 0.167869      |
| C            | 8.896546      | -0.542538     | 0.190979      |
| C            | 8.978776      | 0.93559       | 0.106284      |
| C            | 10.26605      | -1.062015     | 0.196747      |
| C            | 10.418852     | 1.264699      | -0.045711     |
| C            | 11.179347     | 0.089743      | -0.019356     |
| H            | 7.947586      | -2.392147     | 0.128409      |
| C            | 12.558173     | 0.181795      | -0.184306     |
| C            | 13.151349     | 1.440447      | -0.350482     |
| C            | 12.371889     | 2.613905      | -0.359913     |
| C            | 10.984801     | 2.514631      | -0.211533     |

|   |             |           |           |
|---|-------------|-----------|-----------|
| H | 13.20873    | -0.678852 | -0.199828 |
| H | 10.352791   | 3.394549  | -0.237199 |
| C | 10.692404   | -2.356342 | 0.424365  |
| C | 9.832865    | -3.446924 | 0.745338  |
| N | 9.184544    | -4.365412 | 1.019517  |
| C | 12.062763   | -2.747136 | 0.40504   |
| N | 13.156752   | -3.123071 | 0.401422  |
| C | 3.068564    | 1.759132  | 1.583583  |
| H | 3.042971    | 1.082455  | 2.440445  |
| H | 3.958839    | 2.387633  | 1.66661   |
| H | 2.190352    | 2.40788   | 1.63045   |
| C | 3.121235    | 1.950689  | -0.942669 |
| H | 2.245749    | 2.604611  | -0.926689 |
| H | 4.013959    | 2.579471  | -0.895557 |
| H | 3.130078    | 1.410505  | -1.89179  |
| C | -3.428914   | -4.866496 | 0.971032  |
| H | -4.320334   | -5.497688 | 0.928779  |
| H | -2.552606   | -5.519415 | 0.958042  |
| H | -3.437693   | -4.321056 | 1.917154  |
| C | -3.380429   | -4.689081 | -1.556039 |
| H | -3.356929   | -4.017237 | -2.416754 |
| H | -2.501865   | -5.337532 | -1.601009 |
| H | -4.269972   | -5.319387 | -1.634697 |
| O | 8.082991    | 1.763474  | 0.134634  |
| S | -5.49392100 | -0.349137 | -0.015846 |
| S | 5.18334800  | -2.544391 | 0.024213  |
| C | -8.092215   | -1.896141 | -0.159863 |
| H | -8.440062   | -2.919429 | -0.232754 |
| C | -9.07908    | -0.929114 | -0.107495 |
| C | -10.522445  | -1.153623 | -0.129548 |
| C | -8.848068   | 0.524551  | -0.042612 |
| C | -11.174064  | 0.184683  | -0.113041 |
| C | -10.180166  | 1.170574  | -0.052697 |
| C | -12.511448  | 0.577427  | -0.145495 |
| C | -12.825719  | 1.939155  | -0.100889 |
| H | -13.322355  | -0.132233 | -0.198157 |
| C | -10.474001  | 2.521057  | -0.029386 |
| C | -11.814312  | 2.918367  | -0.061071 |
| H | -9.680626   | 3.255796  | -0.004433 |
| C | -11.208516  | -2.352924 | -0.140662 |
| C | -12.630007  | -2.449543 | -0.153909 |
| N | -13.778323  | -2.589211 | -0.163482 |
| C | -10.587582  | -3.635388 | -0.127288 |

|   |            |           |           |
|---|------------|-----------|-----------|
| N | -10.134817 | -4.700226 | -0.114916 |
| O | -7.775759  | 1.110938  | 0.006074  |
| O | 13.014642  | 4.372318  | -1.811996 |
| O | 13.201722  | 4.819225  | 0.340863  |
| O | 15.165036  | 2.6612    | -0.343546 |
| O | 15.292097  | 0.454895  | -0.769755 |
| O | -13.180087 | 4.786806  | -0.676077 |
| O | -11.194043 | 5.154016  | 0.31954   |
| O | -15.072347 | 1.902336  | -0.925866 |
| O | -14.62082  | 2.971847  | 1.00941   |
| C | 16.592408  | 2.790318  | -0.534891 |
| H | 16.809636  | 3.841678  | -0.368517 |
| H | 17.123003  | 2.165869  | 0.183473  |
| H | 16.859561  | 2.496248  | -1.549519 |
| C | 13.19732   | 4.3481    | 1.706784  |
| H | 12.203206  | 4.014324  | 2.005338  |
| H | 13.924274  | 3.546512  | 1.8351    |
| H | 13.488563  | 5.208726  | 2.303745  |
| C | -11.403113 | 6.578714  | 0.196131  |
| H | -10.523339 | 7.037459  | 0.638848  |
| H | -11.496086 | 6.855683  | -0.854101 |
| H | -12.303922 | 6.873711  | 0.734239  |
| C | -15.999486 | 3.395234  | 1.102422  |
| H | -16.080832 | 3.901663  | 2.060341  |
| H | -16.231459 | 4.078729  | 0.285223  |
| H | -16.66465  | 2.532834  | 1.063345  |
| C | 12.922995  | 3.989198  | -0.673768 |
| C | 14.640925  | 1.441619  | -0.519946 |
| C | -12.162542 | 4.370811  | -0.171085 |
| C | -14.292476 | 2.281381  | -0.086291 |

**Table S9:** Calculated energy ( $E$ ) and energy gap ( $\Delta E$ ) of HOMO-1/LUMO+1 and HOMO-2/LUMO+2 for the entitled compounds in  $eV$ .

| Compounds   | HOMO-1 | LUMO+1 | $\Delta E$ | HOMO-2 | LUMO+2 | $\Delta E$ |
|-------------|--------|--------|------------|--------|--------|------------|
| <b>NBR</b>  | -6.540 | -2.977 | 3.077      | -6.729 | -2.928 | 3.71       |
| <b>NBD1</b> | -6.548 | -3.017 | 3.105      | -6.746 | -2.945 | 3.652      |
| <b>NBD2</b> | -6.557 | -3.057 | 3.069      | -6.782 | -2.967 | 3.594      |
| <b>NBD3</b> | -6.561 | -3.101 | 2.908      | -6.776 | -2.987 | 3.206      |
| <b>NBD4</b> | -6.601 | -3.580 | 2.815      | -6.895 | -3.081 | 3.035      |
| <b>NBD5</b> | -6.581 | -3.287 | 3.017      | -6.844 | -3.024 | 3.418      |
| <b>NBD6</b> | -6.602 | -4.000 | 2.898      | -6.910 | -3.212 | 3.197      |
| <b>NBD7</b> | -6.619 | -3.832 | 3.049      | -6.917 | -3.131 | 3.488      |

**Table S10:** Wave length, excitation energy and oscillator strength of **NBR** and **NBD1-NBD7** in solvent phase.

| Compounds | $\lambda$ (nm) | $E$ (eV) | $f_{os}$ | MO contributions |
|-----------|----------------|----------|----------|------------------|
|-----------|----------------|----------|----------|------------------|

|             |         |       |       |                                       |
|-------------|---------|-------|-------|---------------------------------------|
| <b>NBR</b>  | 565.772 | 2.191 | 0.002 | H→L+1 (97%)                           |
|             | 493.054 | 2.515 | 0.010 | H-1→L (88%), H→L+3 (8%)               |
|             | 488.566 | 2.538 | 0.225 | H-2→L (90%), H→L+2 (7%)               |
|             | 485.372 | 2.554 | 0.110 | H→L+2 (86%), H-2→L (7%), H-1→L+3 (3%) |
|             | 458.620 | 2.703 | 0.035 | H→L+3 (83%), H-1→L (9%), H-1→L+2 (3%) |
| <b>NBD1</b> | 561.900 | 2.207 | 0.002 | H→L+1 (96%)                           |
|             | 495.062 | 2.504 | 0.179 | H→L+2 (86%), H-1→L (5%), H-1→L+3 (3%) |
|             | 491.958 | 2.520 | 0.007 | H-1→L (71%), H→L+3 (18%), H→L+2 (7%)  |
|             | 489.028 | 2.535 | 0.129 | H-2→L (96%)                           |
|             | 467.174 | 2.654 | 0.034 | H-1→L (21%), H→L+3 (72%)              |
| <b>NBD2</b> | 568.522 | 2.181 | 0.001 | H→L+1 (97%)                           |
|             | 503.057 | 2.465 | 0.196 | H→L+2 (90%), H-1→L (2%), H-1→L+3 (3%) |
|             | 498.105 | 2.489 | 0.003 | H-1→L (72%), H→L+3 (21%), H→L+2 (3%)  |
|             | 495.695 | 2.501 | 0.126 | H-2→L (96%)                           |
|             | 475.433 | 2.608 | 0.046 | H-1→L (23%), H→L+3 (71%)              |
| <b>NBD3</b> | 618.371 | 2.005 | 0.007 | H→L+1 (96%)                           |
|             | 577.042 | 2.149 | 0.351 | H→L+2 (96%), H-1→L+3 (2%)             |
|             | 534.918 | 2.318 | 0.031 | H-1→L (22%), H→L+3 (74%)              |
|             | 518.824 | 2.390 | 0.160 | H-2→L (96%)                           |
|             | 503.281 | 2.464 | 0.012 | H-1→L (76%), H→L+3 (21%)              |
| <b>NBD4</b> | 653.645 | 1.897 | 0.022 | H→L+1 (96%)                           |
|             | 619.855 | 2.000 | 0.583 | H→L+2 (97%)                           |
|             | 551.503 | 2.248 | 0.025 | H-1→L (12%), H→L+3 (85%)              |
|             | 522.894 | 2.371 | 0.162 | H-2→L (94%), H-2→L+2 (3%)             |
|             | 510.240 | 2.430 | 0.002 | H-1→L (85%), H→L+3 (13%)              |
| <b>NBD5</b> | 584.551 | 2.121 | 0.004 | H→L+1 (96%)                           |
|             | 531.935 | 2.331 | 0.222 | H→L+2 (95%), H-1→L+3 (3%)             |
|             | 510.409 | 2.429 | 0.025 | H-1→L (45%), H→L+3 (51%)              |
|             | 505.931 | 2.451 | 0.148 | H-2→L (96%)                           |
|             | 487.759 | 2.542 | 0.022 | H-1→L (53%), H→L+3 (43%)              |
| <b>NBD6</b> | 623.847 | 1.987 | 0.022 | H→L+1 (95%)                           |
|             | 578.146 | 2.145 | 0.394 | H→L+2 (96%), H-1→L+3 (2%)             |
|             | 532.026 | 2.330 | 0.032 | H-1→L (27%), H→L+3 (69%)              |
|             | 520.588 | 2.382 | 0.163 | H-2→L (96%)                           |
|             | 502.099 | 2.469 | 0.011 | H-1→L (71%), H→L+3 (27%)              |
| <b>NBD7</b> | 574.396 | 2.159 | 0.014 | H→L+1 (96%)                           |
|             | 521.114 | 2.379 | 0.146 | H→L+2 (94%)                           |
|             | 504.120 | 2.459 | 0.046 | H-1→L (50%), H→L+3 (47%)              |
|             | 497.206 | 2.494 | 0.152 | H-2→L (96%)                           |
|             | 484.102 | 2.561 | 0.033 | H-1→L (48%), H→L+3 (47%), H→L+1 (2%)  |

MO=molecular orbital, H=HOMO, L=LUMO,  $f_{os}$  = oscillator strength, wavelength=  $\lambda$  (nm)

**Table S11:** Wave length, excitation energy and oscillator strength of **NBR** and **NBD1-NBD7** in gas phase.

| Compounds  | $\lambda$ (nm) | $E$ (eV) | $f_{os}$ | MO contributions                                   |
|------------|----------------|----------|----------|----------------------------------------------------|
| <b>NBR</b> | 541.412        | 2.290    | 0.002    | H-1→L (10%), H→L+1 (88%)                           |
|            | 474.777        | 2.611    | 0.025    | H-1→L (65%), H→L+3 (20%), H→L+1 (4%), H→L+2 (6%)   |
|            | 468.888        | 2.644    | 0.221    | H-2→L (13%), H→L+2 (74%), H-1→L (4%), H-1→L+3 (3%) |
|            | 464.218        | 2.671    | 0.031    | H-2→L (83%), H→L+2 (11%)                           |
|            | 441.379        | 2.809    | 0.016    | H-1→L (20%), H→L+3 (68%), H→L+1 (5%)               |
|            | 536.841        | 2.310    | 0.002    | H-1→L (10%), H→L+1 (87%)                           |

|             |         |       |       |                                                   |
|-------------|---------|-------|-------|---------------------------------------------------|
| <b>NBD1</b> | 477.962 | 2.594 | 0.094 | H-1→L (24%), H→L+2 (55%), H→L+3 (13%)             |
|             | 474.015 | 2.616 | 0.058 | H-1→L (29%), H→L+2 (35%), H→L+3 (27%)             |
|             | 465.858 | 2.661 | 0.088 | H-2→L (95%)                                       |
|             | 446.996 | 2.774 | 0.014 | H-1→L (36%), H→L+3 (50%), H→L+1 (8%)              |
| <b>NBD2</b> | 541.838 | 2.288 | 0.002 | H-1→L (11%), H→L+1 (87%)                          |
|             | 483.027 | 2.567 | 0.106 | H-1→L (20%), H→L+2 (62%), H→L+3 (11%)             |
|             | 478.700 | 2.590 | 0.050 | H-1→L (32%), H→L+2 (29%), H→L+3 (30%), H→L+1 (2%) |
|             | 470.079 | 2.638 | 0.086 | H-2→L (94%)                                       |
|             | 453.073 | 2.737 | 0.022 | H-1→L (37%), H→L+3 (49%), H→L+1 (8%)              |
| <b>NBD3</b> | 573.254 | 2.163 | 0.003 | H→L+1 (89%), H-1→L (4%), H→L+3 (3%)               |
|             | 537.352 | 2.307 | 0.234 | H→L+2 (95%), H-1→L+3 (2%)                         |
|             | 516.877 | 2.399 | 0.018 | H-1→L (29%), H→L+3 (68%)                          |
|             | 488.835 | 2.536 | 0.115 | H-2→L (96%)                                       |
|             | 471.437 | 2.630 | 0.013 | H-1→L (65%), H→L+3 (26%), H→L+1 (7%)              |
| <b>NBD4</b> | 588.100 | 2.108 | 0.015 | H→L+1 (91%), H-1→L+2 (2%), H→L+3 (4%)             |
|             | 559.946 | 2.214 | 0.307 | H→L+2 (95%)                                       |
|             | 527.207 | 2.352 | 0.017 | H-1→L (27%), H→L+3 (69%)                          |
|             | 490.770 | 2.526 | 0.120 | H-2→L (96%)                                       |
|             | 474.106 | 2.615 | 0.007 | H-1→L (69%), H→L+3 (24%), H→L+1 (4%)              |
| <b>NBD5</b> | 552.609 | 2.244 | 0.002 | H→L+1 (88%), H-1→L (8%)                           |
|             | 505.910 | 2.451 | 0.166 | H→L+2 (93%), H-1→L+3 (2%)                         |
|             | 494.884 | 2.505 | 0.020 | H-1→L (34%), H→L+3 (60%)                          |
|             | 478.959 | 2.589 | 0.104 | H-2→L (96%)                                       |
|             | 460.494 | 2.692 | 0.013 | H-1→L (54%), H→L+3 (33%), H→L+1 (9%)              |
| <b>NBD6</b> | 580.148 | 2.137 | 0.035 | H→L+1 (90%), H-1→L (3%), H→L+2 (2%), H→L+3 (3%)   |
|             | 543.834 | 2.280 | 0.249 | H→L+2 (92%), H-1→L (2%)                           |
|             | 516.619 | 2.400 | 0.036 | H-1→L (31%), H→L+3 (66%)                          |
|             | 490.130 | 2.530 | 0.116 | H-2→L (96%)                                       |
|             | 471.205 | 2.631 | 0.012 | H-1→L (62%), H→L+3 (27%), H→L+1 (6%), H→L+2 (2%)  |
| <b>NBD7</b> | 543.001 | 2.283 | 0.000 | H-1→L (10%), H→L+1 (87%)                          |
|             | 494.273 | 2.508 | 0.080 | H→L+2 (93%), H-1→L+2 (2%)                         |
|             | 485.828 | 2.552 | 0.074 | H-1→L (40%), H→L+3 (54%)                          |
|             | 468.782 | 2.645 | 0.098 | H-2→L (95%)                                       |
|             | 457.486 | 2.710 | 0.022 | H-1→L (47%), H→L+1 (10%), H→L+3 (39%)             |

MO=molecular orbital, H=HOMO, L=LUMO,  $f_{os}$  = oscillator strength, wavelength=  $\lambda$  (nm)

**Table S12:** Percentages for HOMOs and LUMOs of the studied compounds.

| Compound    | LUMO         |           | HOMO         |           |
|-------------|--------------|-----------|--------------|-----------|
|             | Acceptor (%) | Donor (%) | Acceptor (%) | Donor (%) |
| <b>NBR</b>  | 61.1         | 38.9      | 30.0         | 70.0      |
| <b>NBD1</b> | 60.0         | 40.0      | 29.7         | 70.3      |
| <b>NBD2</b> | 60.5         | 39.5      | 30.4         | 69.6      |
| <b>NBD3</b> | 65.0         | 35.0      | 31.5         | 68.5      |
| <b>NBD4</b> | 69.6         | 30.4      | 31.5         | 68.5      |
| <b>NBD5</b> | 61.7         | 38.3      | 30.8         | 69.2      |
| <b>NBD6</b> | 65.7         | 34.3      | 31.5         | 68.5      |
| <b>NBD7</b> | 61.1         | 38.9      | 30.5         | 69.5      |

**Table S13:** Open circuit voltage ( $V_{oc}$ ), Band Gap( $\Delta E$ ),  $eV_{oc}/K_B T$ , FF,  $L_D-L_A(eV)$  & PCE (%) of entitled compounds.

| Compounds | $V_{oc}$ | $\Delta E$ | $eV_{oc}/K_B T$ | FF    | PCE (%) |
|-----------|----------|------------|-----------------|-------|---------|
| NBR       | 2.109    | 2.147      | 81.429          | 0.965 | 29.86   |
| NBD1      | 2.143    | 2.157      | 82.741          | 0.965 | 30.34   |
| NBD2      | 2.176    | 2.130      | 84.015          | 0.966 | 30.84   |
| NBD3      | 2.329    | 2.045      | 89.92           | 0.975 | 33.31   |
| NBD4      | 2.347    | 2.024      | 90.618          | 0.968 | 33.33   |
| NBD5      | 2.257    | 2.100      | 87.143          | 0.967 | 30.02   |
| NBD6      | 2.348    | 2.044      | 90.656          | 0.968 | 33.34   |
| NBD7      | 2.178    | 2.123      | 84.093          | 0.966 | 30.86   |

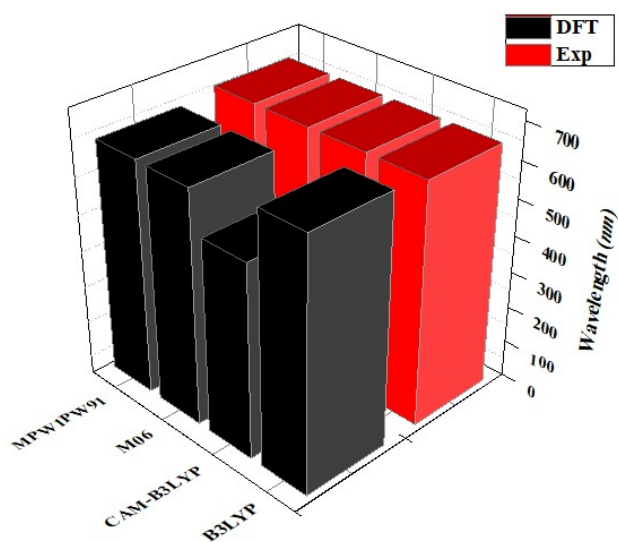

**Figure S1:** A comparative UV–Vis analysis between experimental and DFT-based data of NBR compound in chloroform solvent.

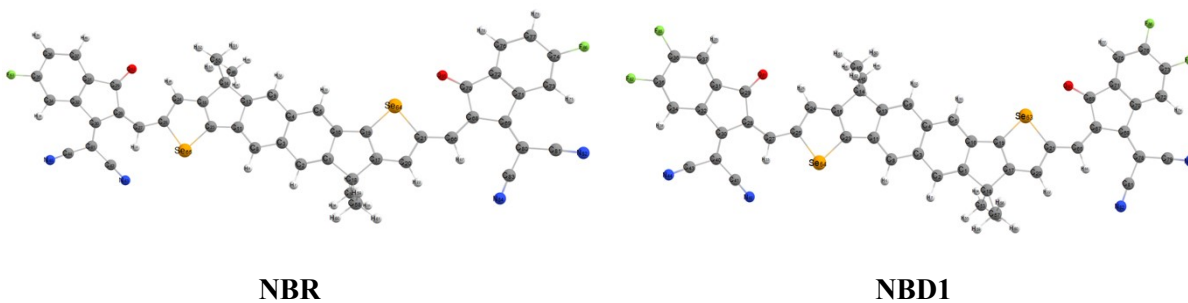

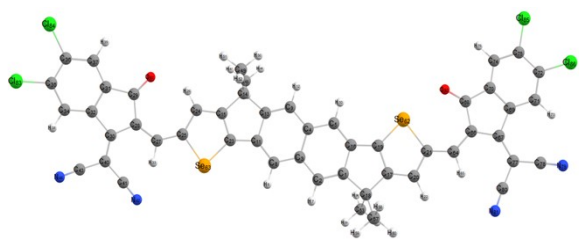

**NBD2**

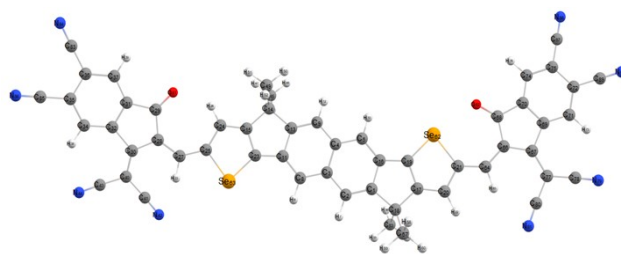

**NBD3**

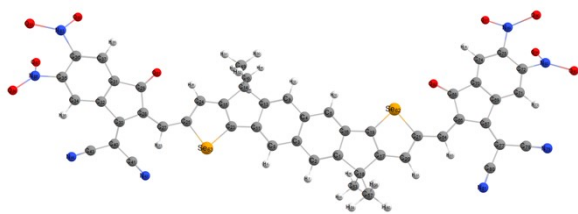

**NBD4**

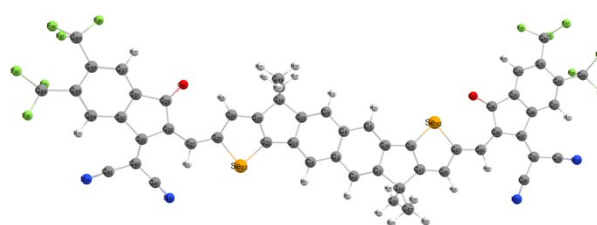

**NBD5**

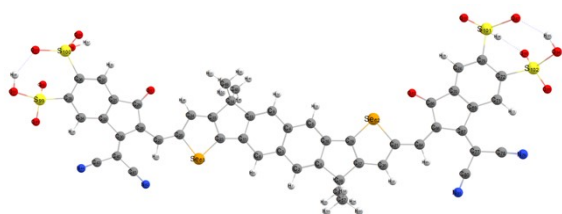

**NBD6**

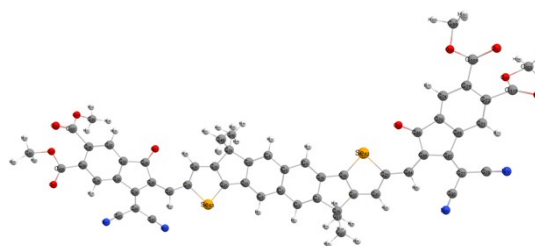

**NBD7**

**Figure S2:** The optimized structures of the investigated compounds **NBR** and **NBD1-NBD7**.

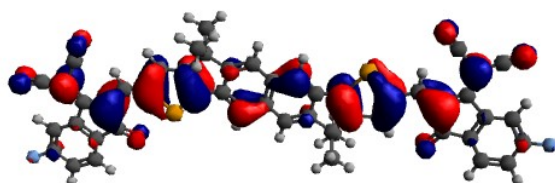

**HOMO-1**

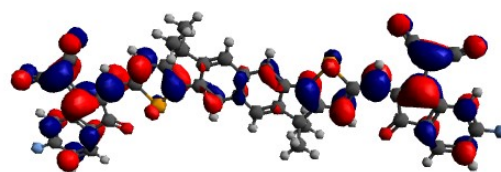

**LUMO+1**

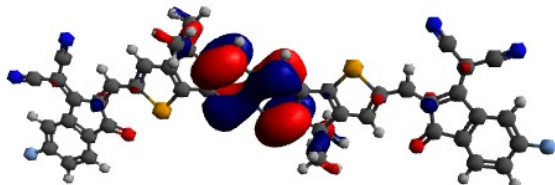

**HOMO-2**

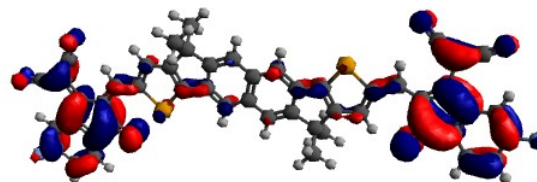

**LUMO+2**

**NBR**

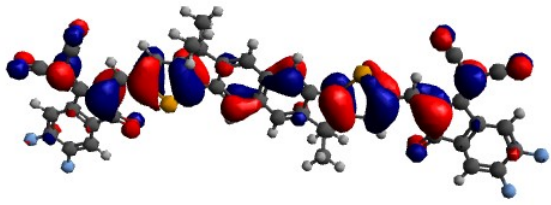

HOMO-1

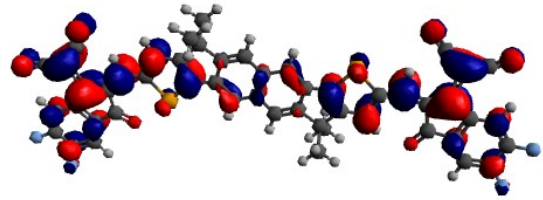

LUMO+1

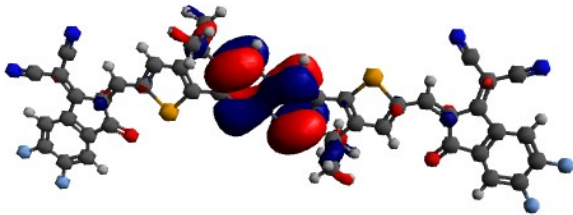

HOMO-2

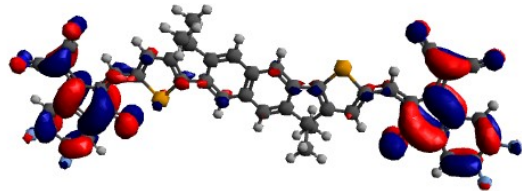

LUMO+2

NBD1

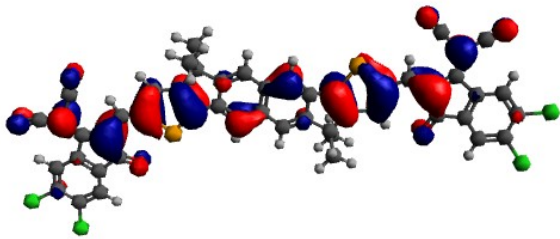

HOMO-1

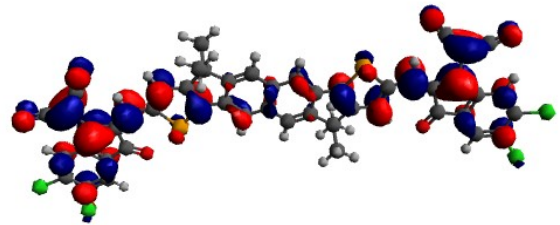

LUMO+1

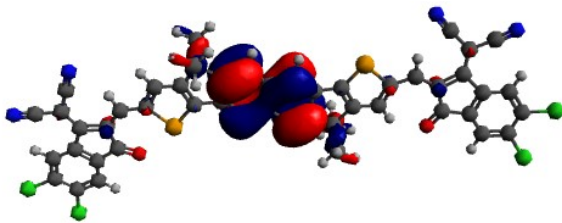

HOMO-2

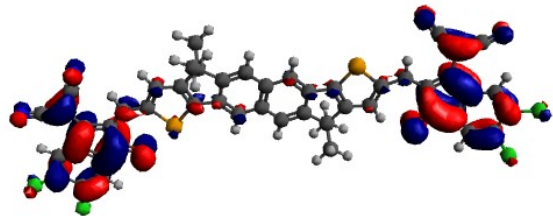

LUMO+2

NBD2

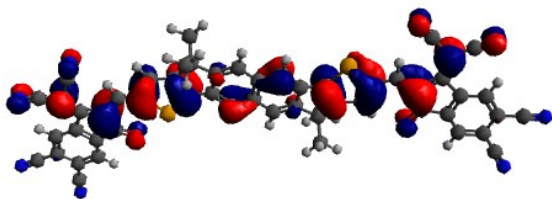

HOMO-1

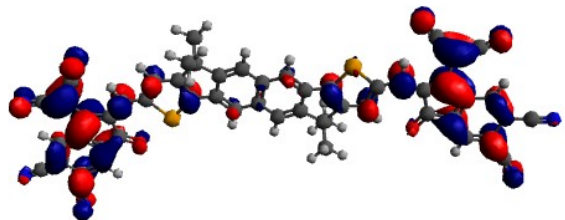

LUMO+1

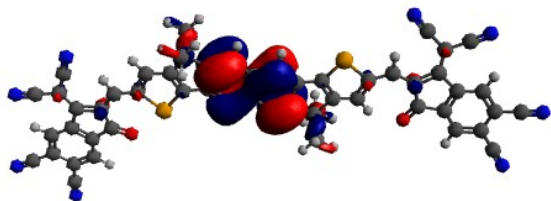

HOMO-2

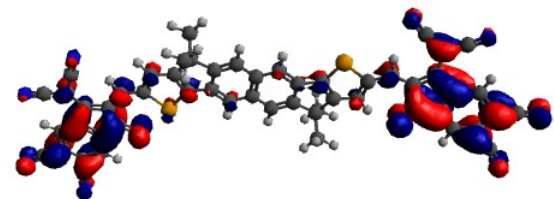

LUMO+2

NBD3



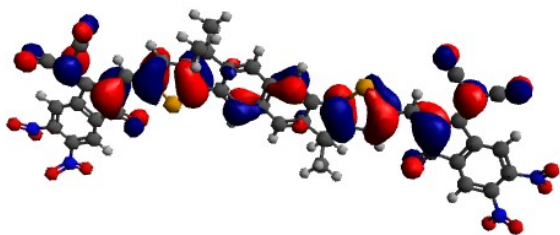

HOMO-1

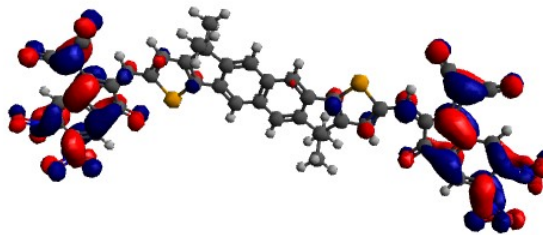

LUMO+1

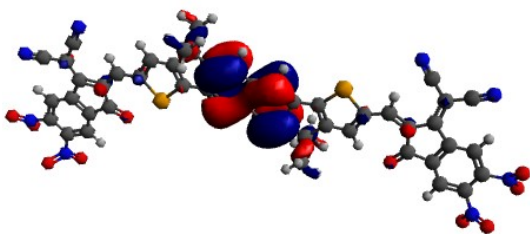

HOMO-2

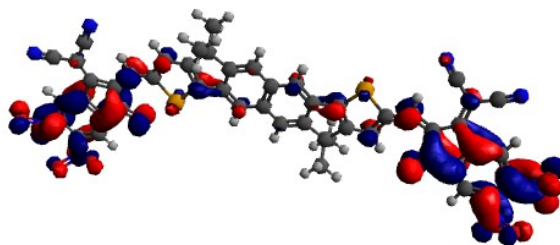

LUMO+2

NBD4

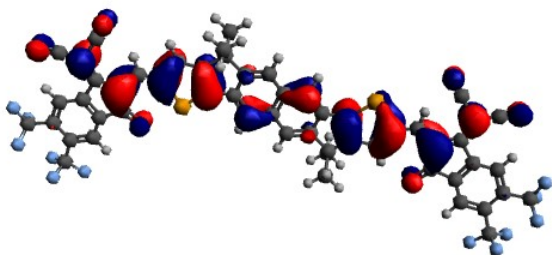

HOMO-1

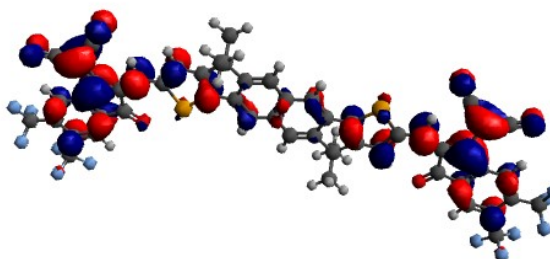

LUMO+1

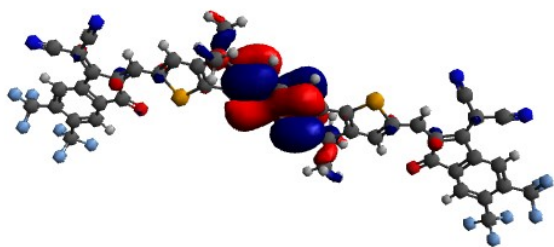

HOMO-2

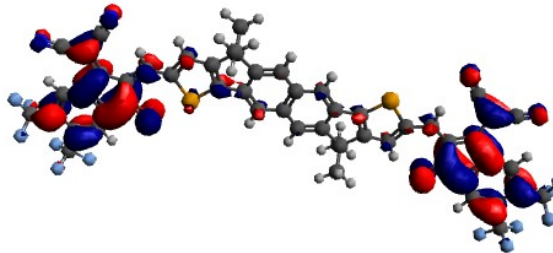

LUMO+2

NBD5

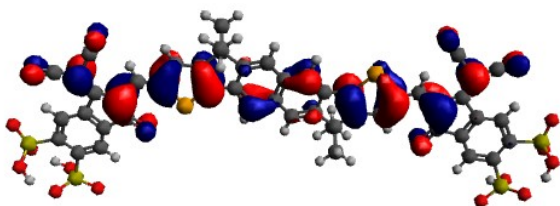

HOMO-1

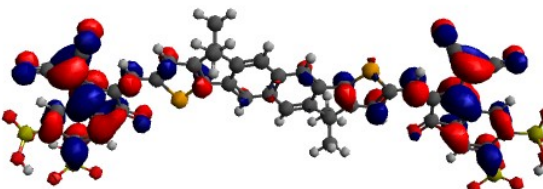

LUMO+1

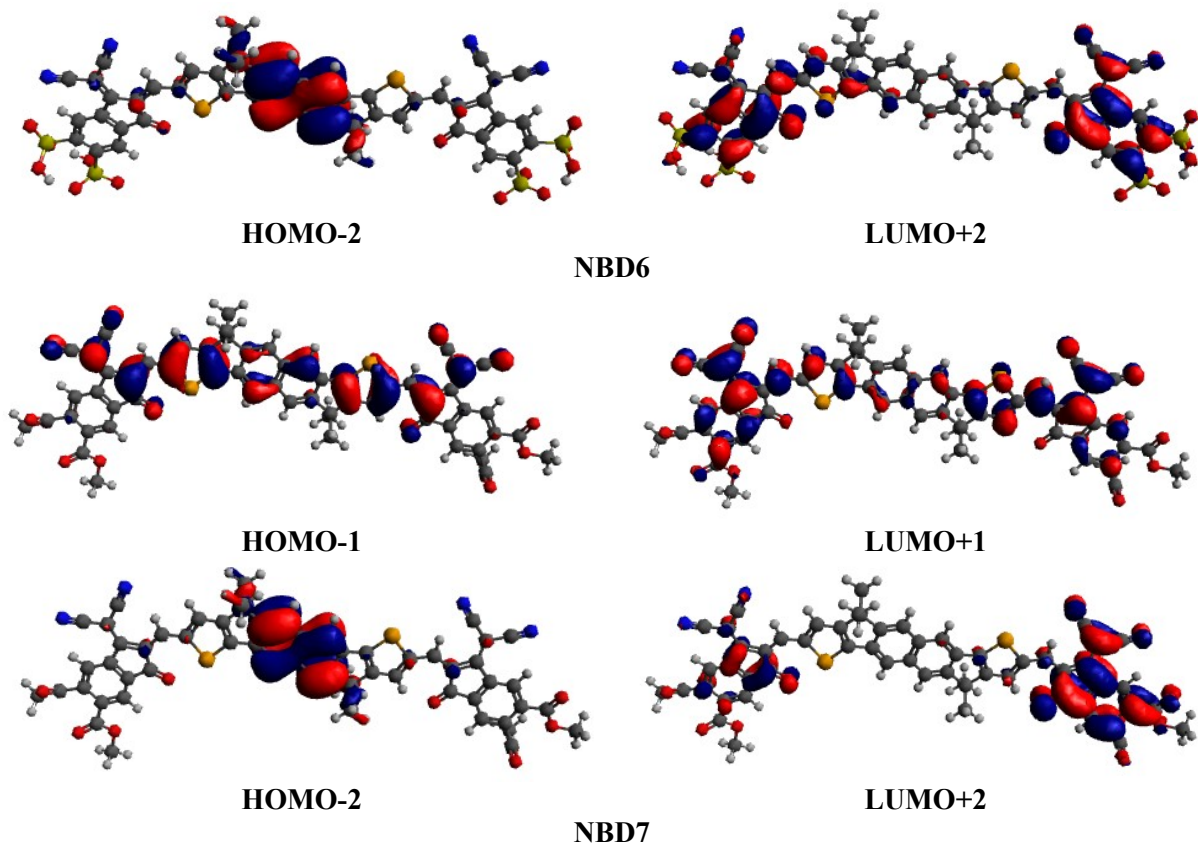

**Figure S3:** Frontier molecular orbital contour plots of HOMO+1/LUMO-1 and HOMO+2/LUMO-2 for the reference (NBR) and designed molecules (NBD1-NBD7).

$$IP = -E_{HOMO} \quad (S1)$$

$$EA = -E_{LUMO} \quad (S2)$$

$$X = \frac{[IP + EA]}{2} \quad (S3)$$

$$\eta = \frac{[IP - EA]}{2} \quad (S4)$$

$$\mu = \frac{E_{HOMO} + E_{LUMO}}{2} \quad (S5)$$

$$\omega = \frac{\mu^2}{2\eta} \quad (S6)$$

$$\sigma = \frac{1}{2\eta} \quad (\text{S7})$$

$$\Delta N_{max} = \frac{\mu}{\eta} \quad (\text{S8})$$
